# Supplementary material for: Freeze-dried Nannochloropsis oceanica biomass protects eicosapentaenoic acid (EPA) from metabolization in the rumen of lambs
Source: PubMed Central journal article supplement (PMC8576006; doi:10.1038/s41598-021-01255-w), 2021-11-08
Supplement: 41598_2021_1255_MOESM1_ESM.pdf [file 41598_2021_1255_MOESM1_ESM.pdf]

## **Freeze-dried *Nannochloropsis oceanica* biomass protects eicosapentaenoic acid (EPA) from metabolization in the rumen of lambs**

Ana C. M. Vitor<sup>1,2</sup>, Alexandra E. Francisco<sup>2,3</sup>, Joana Silva<sup>4</sup>, Mário Pinho<sup>1,2</sup>, Sharon A. Huws<sup>5</sup>, José Santos-Silva<sup>2,3</sup>, Rui J.B. Bessa<sup>1,2</sup>, Susana P. Alves<sup>1,2\*</sup>

<sup>1</sup> Faculdade de Medicina Veterinária, Universidade de Lisboa, Av. da Universidade Técnica, 1300-477, Lisboa, Portugal

<sup>2</sup> CIISA - Centro de Investigação Interdisciplinar em Sanidade Animal, Avenida da Universidade Técnica, 1300-477 Lisboa, Portugal

<sup>3</sup> Polo de Investigação de Santarém, Instituto Nacional de Investigação Agrária e Veterinária (INIAV-Santarém), 2005-048 Vale de Santarém, Portugal

<sup>4</sup> Allmicroalgae, Rua 25 Abril, 2445-413 Pataias, Portugal

<sup>5</sup> School of Biological Sciences, Institute for Global Food Security, Queen's University Belfast, Belfast, United Kingdom

Supplementary material are presented below

**Table S1.** Fatty acid (FA) and dimethyl acetal (DMA) composition in the rumen (% of identified peaks).

| Item                    | Diets <sup>1</sup>         |                             |                             |                            | P-value |
|-------------------------|----------------------------|-----------------------------|-----------------------------|----------------------------|---------|
|                         | C                          | O                           | SD                          | FD                         |         |
| <b>Fatty acids</b>      |                            |                             |                             |                            |         |
| 12:0                    | 0.27 ± 0.030               | 0.26 ± 0.025                | 0.30 ± 0.059                | 0.34 ± 0.019               | 0.061   |
| i-13:0                  | 0.07 <sup>c</sup> ± 0.008  | 0.14 <sup>b</sup> ± 0.009   | 0.21 <sup>a</sup> ± 0.011   | 0.23 <sup>a</sup> ± 0.006  | <0.001  |
| 13:0                    | 0.07 ± 0.016               | 0.07 ± 0.010                | 0.08 ± 0.013                | 0.08 ± 0.014               | 0.970   |
| i-14:0                  | 0.45 ± 0.042               | 0.42 ± 0.056                | 0.51 ± 0.047                | 0.66 ± 0.068               | 0.064   |
| 14:0                    | 0.97 <sup>c</sup> ± 0.273  | 1.20 <sup>c</sup> ± 0.110   | 1.78 <sup>b</sup> ± 0.092   | 2.53 <sup>a</sup> ± 0.117  | <0.001  |
| i-15:0                  | 0.45 <sup>ab</sup> ± 0.059 | 0.48 <sup>a</sup> ± 0.050   | 0.58 <sup>a</sup> ± 0.075   | 0.34 <sup>b</sup> ± 0.031  | 0.017   |
| a-15:0                  | 2.00 <sup>ab</sup> ± 0.412 | 2.01 <sup>a</sup> ± 0.175   | 1.34 <sup>b</sup> ± 0.100   | 1.20 <sup>b</sup> ± 0.136  | 0.005   |
| 15:0                    | 1.25 ± 0.167               | 1.09 ± 0.097                | 1.23 ± 0.125                | 1.02 ± 0.076               | 0.398   |
| 16:0                    | 17.14 <sup>c</sup> ± 0.700 | 22.20 <sup>b</sup> ± 0.897  | 28.41 <sup>a</sup> ± 0.560  | 28.37 <sup>a</sup> ± 0.599 | <0.001  |
| i-16:0                  | 0.60 ± 0.141               | 0.35 <sup>a</sup> ± 0.057   | 0.27 ± 0.029                | 0.33 ± 0.111               | 0.137   |
| c9-16:1                 | 0.12 <sup>c</sup> ± 0.023  | 1.57 <sup>b</sup> ± 0.186   | 2.36 <sup>b</sup> ± 0.607   | 5.58 <sup>a</sup> ± 0.453  | <0.001  |
| t-16:1                  | 0.11 <sup>b</sup> ± 0.024  | 0.22 <sup>ab</sup> ± 0.099  | 0.38 <sup>a</sup> ± 0.058   | 0.35 <sup>a</sup> ± 0.058  | <0.001  |
| i-17:0                  | 0.12 ± 0.016               | 0.16 ± 0.031                | 0.16 ± 0.027                | 0.11 ± 0.035               | 0.406   |
| a-17:0                  | 0.42 <sup>a</sup> ± 0.113  | 0.33 <sup>ab</sup> ± 0.074  | 0.18 <sup>b</sup> ± 0.009   | 0.21 <sup>b</sup> ± 0.015  | 0.034   |
| 17:0                    | 0.65 ± 0.084               | 0.64 ± 0.062                | 0.65 ± 0.068                | 0.56 ± 0.042               | 0.538   |
| 17:0-cyclo <sup>2</sup> | 0.31 <sup>a</sup> ± 0.070  | 0.29 <sup>a</sup> ± 0.053   | 0.15 <sup>b</sup> ± 0.026   | 0.15 <sup>b</sup> ± 0.034  | 0.041   |
| 17:1                    | 0.12 ± 0.023               | 0.12 ± 0.029                | 0.06 ± 0.016                | 0.08 ± 0.009               | 0.160   |
| 18:0                    | 26.39 <sup>a</sup> ± 4.473 | 10.94 <sup>bc</sup> ± 0.876 | 16.91 <sup>ab</sup> ± 3.237 | 9.09 <sup>c</sup> ± 0.821  | 0.002   |
| t6/t7/t8-18:1           | 0.88 ± 0.207               | 1.18 ± 0.194                | 0.96 ± 0.171                | 1.04 ± 0.077               | 0.745   |
| t9-18:1                 | 0.41 ± 0.141               | 0.75 ± 0.126                | 0.77 ± 0.124                | 0.74 ± 0.047               | 0.185   |
| t10-18:1                | 14.0 <sup>a</sup> ± 4.236  | 10.50 <sup>a</sup> ± 3.246  | 3.22 <sup>b</sup> ± 1.022   | 5.49 <sup>ab</sup> ± 1.209 | 0.032   |
| t11-18:1                | 2.31 <sup>b</sup> ± 0.715  | 6.24 <sup>ab</sup> ± 1.858  | 7.38 <sup>a</sup> ± 1.356   | 6.51 <sup>a</sup> ± 1.369  | 0.006   |
| t12-18:1                | 0.75 ± 0.079               | 0.66 ± 0.138                | 1.04 ± 0.105                | 0.92 ± 0.137               | 0.104   |
| t13/t14/c9-18:1         | 7.23 ± 0.870               | 6.42 ± 0.462                | 5.73 ± 0.842                | 6.42 ± 0.450               | 0.680   |
| t15-18:1                | 0.56 <sup>a</sup> ± 0.066  | 0.24 <sup>b</sup> ± 0.086   | 0.59 <sup>a</sup> ± 0.086   | 0.43 <sup>ab</sup> ± 0.079 | 0.028   |
| c11-18:1                | 0.987 ± 0.156              | 1.06 ± 0.134                | 0.94 ± 0.080                | 1.15 ± 0.108               | 0.345   |
| c12-18:1                | 0.35 ± 0.065               | 0.27 ± 0.065                | 0.53 ± 0.098                | 0.36 ± 0.028               | 0.202   |
| c13-18:1                | 0.05 ± 0.010               | 0.05 ± 0.008                | 0.07 ± 0.008                | 0.06 ± 0.011               | 0.315   |
| t16/c14-18:1            | 0.34 ± 0.062               | 0.15 ± 0.074                | 0.38 ± 0.077                | 0.23 ± 0.064               | 0.118   |
| c15-18:1                | 0.27 <sup>ab</sup> ± 0.075 | 0.29 <sup>a</sup> ± 0.061   | 0.12 <sup>b</sup> ± 0.020   | 0.25 <sup>ab</sup> ± 0.074 | 0.019   |
| c16-18:1                | 0.08 ± 0.009               | 0.11 ± 0.013                | 0.09 ± 0.017                | 0.11 ± 0.016               | 0.404   |
| t,t-18:2                | 0.09 ± 0.023               | 0.17 ± 0.048                | 0.05 ± 0.009                | 0.06 ± 0.012               | 0.059   |
| t9,c12-18:2             | 0.07 <sup>b</sup> ± 0.012  | 0.16 <sup>ab</sup> ± 0.054  | 0.14 <sup>ab</sup> ± 0.051  | 0.21 <sup>a</sup> ± 0.049  | 0.037   |
| t11,c15/t10,c15-18:2    | 0.45 <sup>bc</sup> ± 0.105 | 1.49 <sup>a</sup> ± 0.359   | 0.26 <sup>c</sup> ± 0.069   | 0.65 <sup>b</sup> ± 0.150  | 0.006   |
| 18:2n-6                 | 9.027 ± 1.148              | 7.99 ± 0.680                | 4.94 ± 1.147                | 6.95 ± 0.863               | 0.083   |
| c9,t11-CLA              | n.d.                       | 0.10 ± 0.011                | 0.19 ± 0.053                | 0.12 ± 0.026               | 0.228   |
| t,t-CLA                 | 0.17 <sup>a</sup> ± 0.010  | 0.11 <sup>b</sup> ± 0.011   | 0.18 <sup>ab</sup> ± 0.033  | 0.32 <sup>ab</sup> ± 0.117 | 0.002   |
| 18:3n-3                 | 1.69 ± 0.148               | 1.81 ± 0.127                | 1.78 ± 0.056                | 1.57 ± 0.072               | 0.138   |

|            |                            |                            |                            |                            |        |
|------------|----------------------------|----------------------------|----------------------------|----------------------------|--------|
| oxo-18:0   | 0.64 ± 0.239               | 1.58 ± 0.395               | 1.55 ± 0.275               | 1.21 ± 0.290               | 0.077  |
| 20:0       | 0.60 ± 0.048               | 0.50 ± 0.038               | 1.49 ± 0.481               | 0.61 ± 0.117               | 0.104  |
| 20:2n-6    | 0.12 ± 0.064               | 0.29 ± 0.052               | 0.20 ± 0.053               | 0.27 ± 0.042               | 0.174  |
| 20:3n-6    | n.d.                       | 0.24 ± 0.066               | 0.17 ± 0.044               | 0.27 ± 0.024               | 0.101  |
| 20:4n-6    | 0.07 <sup>d</sup> ± 0.041  | 0.29 <sup>c</sup> ± 0.057  | 0.76 <sup>b</sup> ± 0.106  | 1.62 <sup>a</sup> ± 0.122  | <0.001 |
| 20:4n-3    | n.d.                       | 0.83 ± 0.311               | 0.27 ± 0.103               | 0.38 ± 0.075               | 0.232  |
| 20:5n-3    | n.d.                       | 1.14 <sup>b</sup> ± 0.185  | 1.75 <sup>b</sup> ± 0.327  | 3.47 <sup>a</sup> ± 0.356  | <0.001 |
| 21:0       | 0.06 <sup>b</sup> ± 0.004  | 0.14 <sup>a</sup> ± 0.025  | 0.17 <sup>a</sup> ± 0.037  | 0.15 <sup>a</sup> ± 0.034  | 0.001  |
| 22:0       | 0.56 <sup>a</sup> ± 0.025  | 0.54 <sup>ab</sup> ± 0.062 | 0.47 <sup>b</sup> ± 0.027  | 0.43 <sup>b</sup> ± 0.020  | 0.005  |
| 23:0       | 0.26 ± 0.048               | 0.18 ± 0.019               | 0.19 ± 0.026               | 0.17 ± 0.014               | 0.309  |
| 24:0       | 0.55 <sup>a</sup> ± 0.026  | 0.46 <sup>ab</sup> ± 0.041 | 0.41 <sup>bc</sup> ± 0.018 | 0.37 <sup>c</sup> ± 0.006  | <0.001 |
| 24:1       | 0.09 <sup>a</sup> ± 0.008  | 0.07 <sup>ab</sup> ± 0.009 | 0.08 <sup>ab</sup> ± 0.015 | 0.06 <sup>b</sup> ± 0.007  | 0.024  |
| 26:0       | 0.27 <sup>a</sup> ± 0.024  | 0.23 <sup>ab</sup> ± 0.024 | 0.19 <sup>b</sup> ± 0.004  | 0.18 <sup>b</sup> ± 0.014  | 0.017  |
| 28:0       | 0.20 <sup>a</sup> ± 0.010  | 0.15 <sup>b</sup> ± 0.009  | 0.18 <sup>ab</sup> ± 0.014 | 0.11 <sup>c</sup> ± 0.007  | <0.001 |
| <b>DMA</b> |                            |                            |                            |                            |        |
| i-14:0     | 0.11 <sup>b</sup> ± 0.028  | 0.18 <sup>b</sup> ± 0.045  | 0.30 <sup>a</sup> ± 0.033  | 0.20 <sup>ab</sup> ± 0.050 | 0.003  |
| 14:0       | 0.12 <sup>c</sup> ± 0.040  | 0.22 <sup>bc</sup> ± 0.048 | 0.45 <sup>a</sup> ± 0.063  | 0.34 <sup>ab</sup> ± 0.057 | 0.001  |
| i-15:0     | 0.05 ± 0.007               | 0.08 ± 0.025               | 0.10 ± 0.014               | 0.06 ± 0.012               | 0.086  |
| a-15:0     | 0.31 <sup>b</sup> ± 0.053  | 0.41 <sup>ab</sup> ± 0.056 | 0.56 <sup>a</sup> ± 0.046  | 0.33 <sup>b</sup> ± 0.069  | 0.009  |
| 15:0       | 0.31 <sup>a</sup> ± 0.060  | 0.22 <sup>ab</sup> ± 0.025 | 0.18 <sup>bc</sup> ± 0.018 | 0.14 <sup>c</sup> ± 0.017  | 0.016  |
| i-16:0     | 0.71 ± 0.256               | 0.37 ± 0.089               | 0.38 ± 0.083               | 0.49 ± 0.083               | 0.498  |
| 16:0       | 2.353 <sup>a</sup> ± 0.224 | 2.05 <sup>a</sup> ± 0.086  | 1.36 <sup>b</sup> ± 0.104  | 1.50 <sup>b</sup> ± 0.172  | <0.001 |
| 18:0       | 0.17 <sup>a</sup> ± 0.026  | 0.08 <sup>b</sup> ± 0.014  | 0.08 <sup>b</sup> ± 0.016  | 0.06 <sup>b</sup> ± 0.017  | 0.020  |
| t-18:1     | 0.46 <sup>a</sup> ± 0.062  | 0.26 <sup>b</sup> ± 0.043  | 0.23 <sup>b</sup> ± 0.028  | 0.21 <sup>b</sup> ± 0.018  | 0.008  |
| c9-18:1    | 0.109 ± 0.005              | 0.14 ± 0.045               | 0.19 ± 0.047               | 0.15 ± 0.035               | 0.080  |

Values are means ± standard error of the mean. Means within a row with different letters are significantly different ( $P < 0.05$ ). <sup>1</sup>Diets (or treatments): C, control; O, Control plus 1.2% *Nannochloropsis* sp. oil; SD, control plus 12.3% spray-dried *Nannochloropsis oceanica*; FD, control plus 9.2% freeze-dried *N. oceanica*. <sup>2</sup>17:0-cyclo-17, 11-cyclohexyl-11:0.

**Table S2.** Fatty acid and dimethyl acetal composition in the abomasum (% of identified peaks).

| Item                    | Diets <sup>1</sup>          |                             |                            |                            | P-value |
|-------------------------|-----------------------------|-----------------------------|----------------------------|----------------------------|---------|
|                         | C                           | O                           | SD                         | FD                         |         |
| <b>Fatty acids</b>      |                             |                             |                            |                            |         |
| 12:0                    | 0.25 <sup>b</sup> ± 0.025   | 0.34 <sup>ab</sup> ± 0.050  | 0.33 <sup>ab</sup> ± 0.074 | 0.38 <sup>a</sup> ± 0.032  | 0.028   |
| 13:0                    | 0.13 <sup>b</sup> ± 0.014   | 0.19 <sup>ab</sup> ± 0.030  | 0.20 <sup>ab</sup> ± 0.034 | 0.24 <sup>a</sup> ± 0.021  | 0.002   |
| i-14:0                  | 0.12 <sup>b</sup> ± 0.016   | 0.21 <sup>ab</sup> ± 0.050  | 0.24 <sup>a</sup> ± 0.040  | 0.35 <sup>a</sup> ± 0.048  | <0.001  |
| 14:0                    | 0.82 <sup>d</sup> ± 0.216   | 1.35 <sup>c</sup> ± 0.094   | 1.68 <sup>b</sup> ± 0.091  | 2.52 <sup>a</sup> ± 0.103  | <0.001  |
| 15:0                    | 1.05 ± 0.167                | 1.23 ± 0.136                | 1.02 ± 0.182               | 1.05 ± 0.074               | 0.673   |
| i-15:0                  | 0.38 <sup>b</sup> ± 0.029   | 0.50 <sup>ab</sup> ± 0.052  | 0.58 <sup>a</sup> ± 0.039  | 0.39 <sup>b</sup> ± 0.043  | 0.004   |
| a-15:0                  | 2.219 <sup>a</sup> ± 0.128  | 1.98 <sup>a</sup> ± 0.229   | 1.38 <sup>b</sup> ± 0.090  | 1.20 <sup>b</sup> ± 0.148  | <0.001  |
| 16:0                    | 17.33 <sup>c</sup> ± 0.341  | 22.20 <sup>b</sup> ± 1.095  | 27.43 <sup>a</sup> ± 0.408 | 28.21 <sup>a</sup> ± 0.584 | <0.001  |
| i-16:0                  | 0.57 ± 0.119                | 0.42 ± 0.084                | 0.29 ± 0.038               | 0.38 ± 0.105               | 0.117   |
| c9-16:1                 | 0.15 <sup>c</sup> ± 0.018   | 1.90 <sup>b</sup> ± 0.278   | 2.42 <sup>b</sup> ± 0.365  | 5.60 <sup>a</sup> ± 0.414  | <0.001  |
| 16:0-Me <sub>4</sub>    | 0.10 <sup>b</sup> ± 0.021   | 0.23 <sup>ab</sup> ± 0.091  | 0.42 <sup>a</sup> ± 0.058  | 0.25 <sup>ab</sup> ± 0.077 | <0.001  |
| 17:0                    | 0.877 ± 0.061               | 0.84 ± 0.082                | 0.74 ± 0.050               | 0.70 ± 0.063               | 0.4559  |
| i-17:0                  | 0.18 <sup>c</sup> ± 0.027   | 0.29 <sup>abc</sup> ± 0.067 | 0.45 <sup>a</sup> ± 0.046  | 0.32 <sup>b</sup> ± 0.034  | <0.001  |
| a-17:0                  | 0.43 <sup>a</sup> ± 0.105   | 0.38 <sup>ab</sup> ± 0.093  | 0.20 <sup>b</sup> ± 0.012  | 0.11 <sup>c</sup> ± 0.031  | 0.005   |
| c9-17:1                 | 0.16 <sup>ab</sup> ± 0.028  | 0.19 <sup>a</sup> ± 0.024   | 0.09 <sup>b</sup> ± 0.019  | 0.18 <sup>a</sup> ± 0.015  | 0.006   |
| 17:0-cyclo <sup>2</sup> | 0.31 <sup>ab</sup> ± 0.088  | 0.36 <sup>a</sup> ± 0.072   | 0.20 <sup>bc</sup> ± 0.028 | 0.15 <sup>c</sup> ± 0.033  | 0.058   |
| 18:0                    | 28.30 <sup>a</sup> ± 6.451  | 12.92 <sup>b</sup> ± 1.212  | 16.93 <sup>b</sup> ± 2.937 | 9.47 <sup>c</sup> ± 0.610  | 0.003   |
| oxo-18:0                | 0.48 <sup>b</sup> ± 0.170   | 1.27 <sup>a</sup> ± 0.281   | 1.48 <sup>a</sup> ± 0.202  | 1.03 <sup>a</sup> ± 0.282  | 0.007   |
| t6/t7/t8-18:1           | 0.93 ± 0.219                | 1.25 ± 0.219                | 1.16 ± 0.145               | 1.09 ± 0.067               | 0.755   |
| t9-18:1                 | 0.656 ± 0.135               | 0.74 ± 0.165                | 0.89 ± 0.116               | 0.78 ± 0.056               | 0.347   |
| t10-18:1                | 13.69 <sup>ab</sup> ± 3.855 | 13.08 <sup>a</sup> ± 3.307  | 3.69 <sup>c</sup> ± 1.084  | 5.56 <sup>bc</sup> ± 1.219 | 0.018   |
| t11-18:1                | 2.31 <sup>b</sup> ± 0.734   | 7.43 <sup>ab</sup> ± 2.560  | 8.87 <sup>a</sup> ± 2.139  | 6.96 <sup>a</sup> ± 1.648  | 0.008   |
| t12-18:1                | 0.78 <sup>b</sup> ± 0.090   | 0.88 <sup>ab</sup> ± 0.228  | 1.26 <sup>a</sup> ± 0.082  | 1.00 <sup>ab</sup> ± 0.156 | 0.006   |
| t13/t14/c9-18:1         | 7.83 <sup>a</sup> ± 0.767   | 6.99 <sup>a</sup> ± 0.308   | 5.45 <sup>b</sup> ± 0.373  | 6.88 <sup>a</sup> ± 0.355  | 0.010   |
| t15-18:1                | 0.55 ± 1.110                | 0.46 ± 0.185                | 0.69 ± 0.092               | 0.39 ± 0.083               | 0.159   |
| c11-18:1                | 0.84 <sup>b</sup> ± 0.093   | 1.02 <sup>ab</sup> ± 0.201  | 1.02 <sup>ab</sup> ± 0.090 | 1.28 <sup>a</sup> ± 0.104  | 0.040   |
| c12-18:1                | 0.41 ± 0.059                | 0.38 ± 0.067                | 0.72 ± 0.136               | 0.44 ± 0.026               | 0.176   |
| c13-18:1                | 0.09 ± 0.017                | 0.08 ± 0.023                | 0.11 ± 0.006               | 0.09 ± 0.016               | 0.327   |
| t16/c14-18:1            | 0.43 ± 0.093                | 0.21 ± 0.088                | 0.47 ± 0.080               | 0.28 ± 0.059               | 0.110   |
| c15-18:1                | 0.30 <sup>a</sup> ± 0.054   | 0.38 <sup>a</sup> ± 0.053   | 0.19 <sup>b</sup> ± 0.018  | 0.27 <sup>ab</sup> ± 0.066 | 0.012   |
| c16-18:1                | 0.11 ± 0.018                | 0.15 ± 0.013                | 0.16 ± 0.016               | 0.15 ± 0.021               | 0.304   |
| t9,c12-18:2             | 0.08 <sup>b</sup> ± 0.012   | 0.22 <sup>a</sup> ± 0.041   | 0.22 <sup>a</sup> ± 0.035  | 0.25 <sup>a</sup> ± 0.038  | <0.001  |
| t11,c15/t10,c15-18:2    | 0.49 <sup>bc</sup> ± 0.131  | 1.89 <sup>a</sup> ± 0.430   | 0.33 <sup>c</sup> ± 0.064  | 0.76 <sup>b</sup> ± 0.182  | 0.005   |
| 18:2n-6                 | 9.86 <sup>a</sup> ± 1.447   | 7.96 <sup>ab</sup> ± 1.020  | 3.90 <sup>c</sup> ± 0.424  | 6.60 <sup>b</sup> ± 0.702  | <0.001  |
| 18:3n-3/20:1            | 0.51 <sup>ab</sup> ± 0.285  | 0.92 <sup>ab</sup> ± 0.313  | 1.08 <sup>a</sup> ± 0.114  | 0.27 <sup>b</sup> ± 0.078  | 0.003   |
| c9,t11-CLA              | n.d.                        | 0.13 <sup>b</sup> ± 0.030   | 0.26 <sup>a</sup> ± 0.033  | 0.17 <sup>ab</sup> ± 0.031 | 0.034   |
| 20:0                    | 0.64 ± 0.050                | 0.64 ± 0.066                | 1.30 ± 0.364               | 0.60 ± 0.048               | 0.312   |
| 20:2n-6                 | 0.14 <sup>b</sup> ± 0.052   | 0.49 <sup>a</sup> ± 0.090   | 0.52 <sup>a</sup> ± 0.107  | 0.47 <sup>a</sup> ± 0.101  | 0.002   |
| 20:3n-6                 | 0.04 <sup>b</sup> ± 0.218   | 0.68 <sup>a</sup> ± 0.078   | 0.49 <sup>ab</sup> ± 0.092 | 0.45 <sup>ab</sup> ± 0.076 | 0.044   |

|            |                           |                            |                           |                            |        |
|------------|---------------------------|----------------------------|---------------------------|----------------------------|--------|
| 20:4n-6    | 0.07 <sup>d</sup> ± 0.014 | 0.36 <sup>c</sup> ± 0.049  | 0.79 <sup>b</sup> ± 0.064 | 1.62 <sup>a</sup> ± 0.116  | <0.001 |
| 20:5n-3    | n.d.                      | 1.44 <sup>b</sup> ± 0.192  | 1.60 <sup>b</sup> ± 0.151 | 3.38 <sup>a</sup> ± 0.390  | 0.001  |
| 21:0       | 0.02 ± 0.071              | 0.12 ± 0.031               | 0.15 ± 0.025              | 0.14 ± 0.030               | 0.426  |
| 22:0       | 0.56 <sup>b</sup> ± 0.037 | 0.80 <sup>a</sup> ± 0.048  | 0.54 <sup>b</sup> ± 0.045 | 0.53 <sup>b</sup> ± 0.030  | 0.001  |
| 24:0       | 0.61 <sup>a</sup> ± 0.035 | 0.56 <sup>a</sup> ± 0.036  | 0.43 <sup>b</sup> ± 0.011 | 0.38 <sup>c</sup> ± 0.016  | <0.001 |
| 26:0       | 0.28 <sup>a</sup> ± 0.011 | 0.30 <sup>a</sup> ± 0.024  | 0.22 <sup>b</sup> ± 0.013 | 0.19 <sup>b</sup> ± 0.018  | <0.001 |
| <b>DMA</b> |                           |                            |                           |                            |        |
| i-14:0     | 0.10 <sup>b</sup> ± 0.017 | 0.15 <sup>ab</sup> ± 0.027 | 0.24 <sup>a</sup> ± 0.050 | 0.19 <sup>ab</sup> ± 0.052 | 0.041  |
| 14:0       | 0.12 <sup>c</sup> ± 0.035 | 0.20 <sup>bc</sup> ± 0.038 | 0.35 <sup>a</sup> ± 0.044 | 0.32 <sup>ab</sup> ± 0.044 | 0.001  |
| a-15:0     | 0.14 ± 0.045              | 0.17 ± 0.067               | 0.06 ± 0.010              | 0.24 ± 0.154               | 0.102  |
| 15:0       | 0.27 <sup>a</sup> ± 0.028 | 0.21 <sup>ab</sup> ± 0.024 | 0.16 <sup>b</sup> ± 0.022 | 0.16 <sup>b</sup> ± 0.037  | 0.021  |
| 16:0       | 1.63 <sup>a</sup> ± 0.183 | 1.31 <sup>ab</sup> ± 0.114 | 0.83 <sup>c</sup> ± 0.050 | 0.99 <sup>bc</sup> ± 0.134 | <0.001 |
| 18:1       | 0.41 ± 0.074              | 0.30 ± 0.067               | 0.27 ± 0.036              | 0.24 ± 0.024               | 0.178  |

Values are means ± standard error of the mean. Means within a row with different letters are significantly different ( $P < 0.05$ ). <sup>1</sup>Diets (or treatments): C, control; O, Control plus 1.2% *Nannochloropsis* sp. oil; SD, control plus 12.3% spray-dried *Nannochloropsis oceanica*; FD, control plus 9.2% freeze-dried *N. oceanica*. <sup>2</sup>17:0-cyclo-17, 11-cyclohexyl-11:0.

**Table S3.** Fatty acid and dimethyl acetal composition in the cecum (% of identified peaks).

| Item                    | Diets <sup>1</sup>         |                            |                            |                            | P-value |
|-------------------------|----------------------------|----------------------------|----------------------------|----------------------------|---------|
|                         | C                          | O                          | SD                         | FD                         |         |
| <b>Fatty acids</b>      |                            |                            |                            |                            |         |
| 12:0                    | 0.42 ± 0.079               | 0.43 ± 0.120               | 0.60 ± 0.116               | 0.58 ± 0.038               | 0.210   |
| 13:0                    | 0.11 <sup>b</sup> ± 0.016  | 0.18 <sup>b</sup> ± 0.046  | 0.37 <sup>a</sup> ± 0.051  | 0.54 <sup>a</sup> ± 0.123  | <0.001  |
| i-14:0                  | 0.56 ± 0.071               | 0.69 ± 0.115               | 1.10 ± 0.315               | 0.84 ± 0.091               | 0.089   |
| 14:0                    | 1.24 <sup>c</sup> ± 0.166  | 1.69 <sup>c</sup> ± 0.329  | 2.93 <sup>b</sup> ± 0.364  | 3.99 <sup>a</sup> ± 0.298  | <0.001  |
| i-15:0                  | 0.53 ± 0.075               | 0.82 ± 0.227               | 0.89 ± 0.123               | 0.70 ± 0.121               | 0.104   |
| a-15:0                  | 2.577 ± 0.489              | 2.69 ± 0.394               | 2.31 ± 0.358               | 2.24 ± 0.121               | 0.656   |
| 15:0                    | 1.88 ± 0.184               | 1.74 ± 0.211               | 2.43 ± 0.280               | 2.10 ± 0.143               | 0.222   |
| i-16:0                  | 1.06 ± 0.231               | 0.60 ± 0.057               | 0.86 ± 0.175               | 0.81 ± 0.154               | 0.126   |
| 16:0                    | 20.26 <sup>d</sup> ± 0.274 | 23.79 <sup>c</sup> ± 0.866 | 28.75 <sup>b</sup> ± 0.334 | 31.44 <sup>a</sup> ± 0.559 | <0.001  |
| t-16:1                  | 0.07 <sup>b</sup> ± 0.014  | 0.12 <sup>ab</sup> ± 0.035 | 0.21 <sup>a</sup> ± 0.027  | 0.21 <sup>a</sup> ± 0.037  | 0.001   |
| c7-16:1                 | 0.08 <sup>b</sup> ± 0.016  | 0.20 <sup>a</sup> ± 0.034  | 0.16 <sup>a</sup> ± 0.034  | 0.24 <sup>a</sup> ± 0.036  | 0.001   |
| c9-16:1                 | 0.09 <sup>d</sup> ± 0.026  | 0.88 <sup>c</sup> ± 0.115  | 2.24 <sup>b</sup> ± 0.320  | 3.99 <sup>a</sup> ± 0.514  | <0.001  |
| i-17:0                  | 0.64 <sup>c</sup> ± 0.060  | 0.74 <sup>bc</sup> ± 0.126 | 1.38 <sup>a</sup> ± 0.205  | 0.92 <sup>ab</sup> ± 0.100 | 0.008   |
| a-17:0                  | 0.99 ± 0.240               | 0.67 ± 0.086               | 0.97 ± 0.153               | 0.59 ± 0.076               | 0.109   |
| 17:0                    | 2.15 ± 0.220               | 1.80 ± 0.230               | 2.15 ± 0.300               | 1.97 ± 0.177               | 0.683   |
| 17:1                    | 0.17 ± 0.046               | 0.16 ± 0.025               | 0.22 ± 0.086               | 0.18 ± 0.038               | 0.919   |
| 17:0-cyclo <sup>2</sup> | 0.44 ± 0.119               | 0.48 ± 0.123               | 0.31 ± 0.086               | 0.35 ± 0.096               | 0.658   |
| 18:0                    | 28.92 <sup>a</sup> ± 5.692 | 14.37 <sup>b</sup> ± 2.678 | 13.77 <sup>b</sup> ± 3.483 | 10.77 <sup>b</sup> ± 1.071 | 0.026   |
| i-18:0                  | 0.29 ± 0.058               | 0.18 ± 0.063               | 0.40 ± 0.173               | 0.22 ± 0.040               | 0.433   |
| t6/t7/t8-18:1           | 0.74 ± 0.209               | 0.54 ± 0.195               | 0.58 ± 0.149               | 0.51 ± 0.080               | 0.765   |
| t9-18:1                 | 0.37 ± 0.098               | 0.63 ± 0.173               | 0.40 ± 0.109               | 0.36 ± 0.040               | 0.515   |
| t10-18:1                | 9.53 <sup>a</sup> ± 2.955  | 8.35 <sup>ab</sup> ± 3.041 | 1.92 <sup>b</sup> ± 0.881  | 2.41 <sup>b</sup> ± 0.803  | 0.042   |
| t11-18:1                | 3.08 ± 0.812               | 7.24 ± 2.975               | 4.57 ± 0.905               | 3.83 ± 0.564               | 0.437   |
| t12-18:1                | 0.69 ± 0.078               | 0.52 ± 0.038               | 0.70 ± 0.132               | 0.49 ± 0.063               | 0.148   |
| t15-18:1                | 0.45 <sup>a</sup> ± 0.054  | 0.14 <sup>c</sup> ± 0.020  | 0.28 <sup>b</sup> ± 0.063  | 0.11 <sup>c</sup> ± 0.026  | <0.001  |
| t16/c14-18:1            | 0.31 ± 0.074               | 0.11 ± 0.038               | 0.28 ± 0.067               | 0.14 ± 0.031               | 0.054   |
| c9/t13/t14-18:1         | 6.13 <sup>ab</sup> ± 0.869 | 5.63 <sup>a</sup> ± 0.491  | 4.27 <sup>bc</sup> ± 0.359 | 3.99 <sup>c</sup> ± 0.215  | 0.012   |
| c11-18:1                | 0.76 ± 0.101               | 0.99 ± 0.090               | 0.82 ± 0.089               | 0.87 ± 0.081               | 0.351   |
| c12-18:1                | 0.57 ± 0.130               | 0.68 ± 0.190               | 0.70 ± 0.137               | 0.54 ± 0.061               | 0.671   |
| c13-18:1                | 0.04 ± 0.004               | 0.05 ± 0.005               | 0.10 ± 0.021               | 0.06 ± 0.017               | 0.121   |
| c15-18:1                | 0.22 <sup>b</sup> ± 0.048  | 0.44 <sup>a</sup> ± 0.079  | 0.13 <sup>b</sup> ± 0.021  | 0.24 <sup>ab</sup> ± 0.085 | 0.009   |
| c16-18:1                | 0.13 ± 0.017               | 0.14 ± 0.032               | 0.08 ± 0.012               | 0.08 ± 0.017               | 0.062   |
| t,t-18:2                | 0.08 ± 0.013               | 0.13 ± 0.030               | 0.10 ± 0.012               | 0.06 ± 0.007               | 0.053   |
| t,c-18:2                | 0.07 <sup>b</sup> ± 0.017  | 0.13 <sup>a</sup> ± 0.015  | 0.14 <sup>a</sup> ± 0.026  | 0.11 <sup>ab</sup> ± 0.013 | 0.047   |
| t11,c15/t10,c15-18:2    | 0.38 <sup>b</sup> ± 0.114  | 1.14 <sup>a</sup> ± 0.224  | 0.26 <sup>b</sup> ± 0.053  | 0.39 <sup>b</sup> ± 0.078  | 0.008   |
| 18:2n-6                 | 3.28 ± 0.598               | 4.13 ± 0.531               | 2.81 ± 0.372               | 2.80 ± 0.300               | 0.179   |
| 18:3n-3/20:1            | 0.75 <sup>b</sup> ± 0.104  | 1.16 <sup>a</sup> ± 0.089  | 1.06 <sup>ab</sup> ± 0.149 | 0.85 <sup>b</sup> ± 0.052  | 0.018   |
| c9,t11-CLA              | 0.311 <sup>b</sup> ± 0.008 | 0.18 <sup>a</sup> ± 0.015  | 0.30 <sup>ab</sup> ± 0.128 | 0.23 <sup>a</sup> ± 0.044  | 0.001   |
| c,t-CLA                 | 0.04 ± 0.026               | 0.08 ± 0.023               | 0.14 ± 0.038               | 0.24 ± 0.192               | 0.219   |

|                 |                           |                            |                           |                            |        |
|-----------------|---------------------------|----------------------------|---------------------------|----------------------------|--------|
| <i>t,t</i> -CLA | 0.70 ± 0.118              | 1.48 ± 1.032               | 0.74 ± 0.284              | 1.87 ± 0.426               | 0.090  |
| oxo-18:0        | 0.16 ± 0.062              | 0.32 ± 0.059               | 0.31 ± 0.066              | 0.21 ± 0.049               | 0.240  |
| 20:0            | 0.78 ± 0.053              | 0.79 ± 0.092               | 1.44 ± 0.403              | 0.80 ± 0.031               | 0.467  |
| 20:2n-6         | 0.39 ± 0.175              | 0.33 ± 0.061               | 0.52 ± 0.165              | 0.53 ± 0.104               | 0.386  |
| 20:3n-3         | n.d.                      | 0.67 ± 0.113               | 0.44 ± 0.103              | 0.60 ± 0.075               | 0.317  |
| 20:3n-6         | 0.05 <sup>b</sup> ± 0.004 | 0.19 <sup>a</sup> ± 0.047  | 0.28 <sup>a</sup> ± 0.049 | 0.19 <sup>a</sup> ± 0.034  | <0.001 |
| 20:4n-6         | 0.19 <sup>b</sup> ± 0.052 | 0.40 <sup>b</sup> ± 0.106  | 1.55 <sup>a</sup> ± 0.255 | 1.92 <sup>a</sup> ± 0.181  | <0.001 |
| 20:5n-3         | n.d.                      | 1.11 <sup>b</sup> ± 0.246  | 3.13 <sup>a</sup> ± 0.498 | 3.41 <sup>a</sup> ± 0.391  | <0.001 |
| 21:0            | 0.08 <sup>b</sup> ± 0.006 | 0.12 <sup>a</sup> ± 0.012  | 0.18 <sup>a</sup> ± 0.035 | 0.14 <sup>a</sup> ± 0.017  | 0.002  |
| 22:0            | 0.79 ± 0.067              | 0.87 ± 0.079               | 0.85 ± 0.088              | 0.73 ± 0.029               | 0.231  |
| 23:0            | 0.31 <sup>b</sup> ± 0.026 | 0.39 <sup>ab</sup> ± 0.032 | 0.45 <sup>a</sup> ± 0.048 | 0.42 <sup>a</sup> ± 0.037  | 0.032  |
| 24:0            | 0.95 ± 0.062              | 1.00 ± 0.158               | 1.35 ± 0.214              | 1.07 ± 0.077               | 0.281  |
| 26:0            | 0.55 ± 0.051              | 0.72 ± 0.179               | 0.68 ± 0.066              | 0.65 ± 0.069               | 0.376  |
| 28:0            | 0.43 ± 0.034              | 0.59 ± 0.183               | 0.54 ± 0.086              | 0.50 ± 0.059               | 0.441  |
| <b>DMA</b>      |                           |                            |                           |                            |        |
| i-14:0          | 0.12 <sup>b</sup> ± 0.021 | 0.24 <sup>ab</sup> ± 0.065 | 0.40 <sup>a</sup> ± 0.108 | 0.32 <sup>a</sup> ± 0.076  | 0.009  |
| 14:0            | 0.11 <sup>b</sup> ± 0.015 | 0.33 <sup>ab</sup> ± 0.140 | 0.72 <sup>a</sup> ± 0.161 | 0.66 <sup>a</sup> ± 0.127  | <0.001 |
| a-15:0          | 0.34 <sup>b</sup> ± 0.039 | 0.59 <sup>ab</sup> ± 0.164 | 0.63 <sup>a</sup> ± 0.065 | 0.53 <sup>ab</sup> ± 0.088 | 0.004  |
| 15:0            | 0.35 ± 0.132              | 0.28 ± 0.081               | 0.29 ± 0.062              | 0.26 ± 0.051               | 0.930  |
| 16:0            | 2.43 ± 0.844              | 2.77 ± 0.799               | 2.39 ± 0.409              | 2.51 ± 0.291               | 0.978  |
| 18:0            | 0.31 ± 0.093              | 0.23 ± 0.040               | 0.34 ± 0.092              | 0.25 ± 0.036               | 0.652  |
| 18:1            | 0.61 ± 0.257              | 0.47 ± 0.157               | 0.55 ± 0.158              | 0.47 ± 0.053               | 0.913  |

Values are means ± standard error of the mean. Means within a row with different letters are significantly different ( $P < 0.05$ ). <sup>1</sup>Diets (or treatments): C, control; O, Control plus 1.2% *Nannochloropsis* sp. oil; SD, control plus 12.3% spray-dried *Nannochloropsis oceanica*; FD, control plus 9.2% freeze-dried *N. oceanica*. <sup>2</sup>17:0-cyclo-17, 11-cyclohexyl-11:0.
